# Supplementary material
Source: PubMed Central journal article supplement (PMC2672153)
Supplement: NIHMS4417-supplement-Fig_1.pdf [file NIHMS4417-supplement-Fig_1.pdf]

# Phenotype Distribution

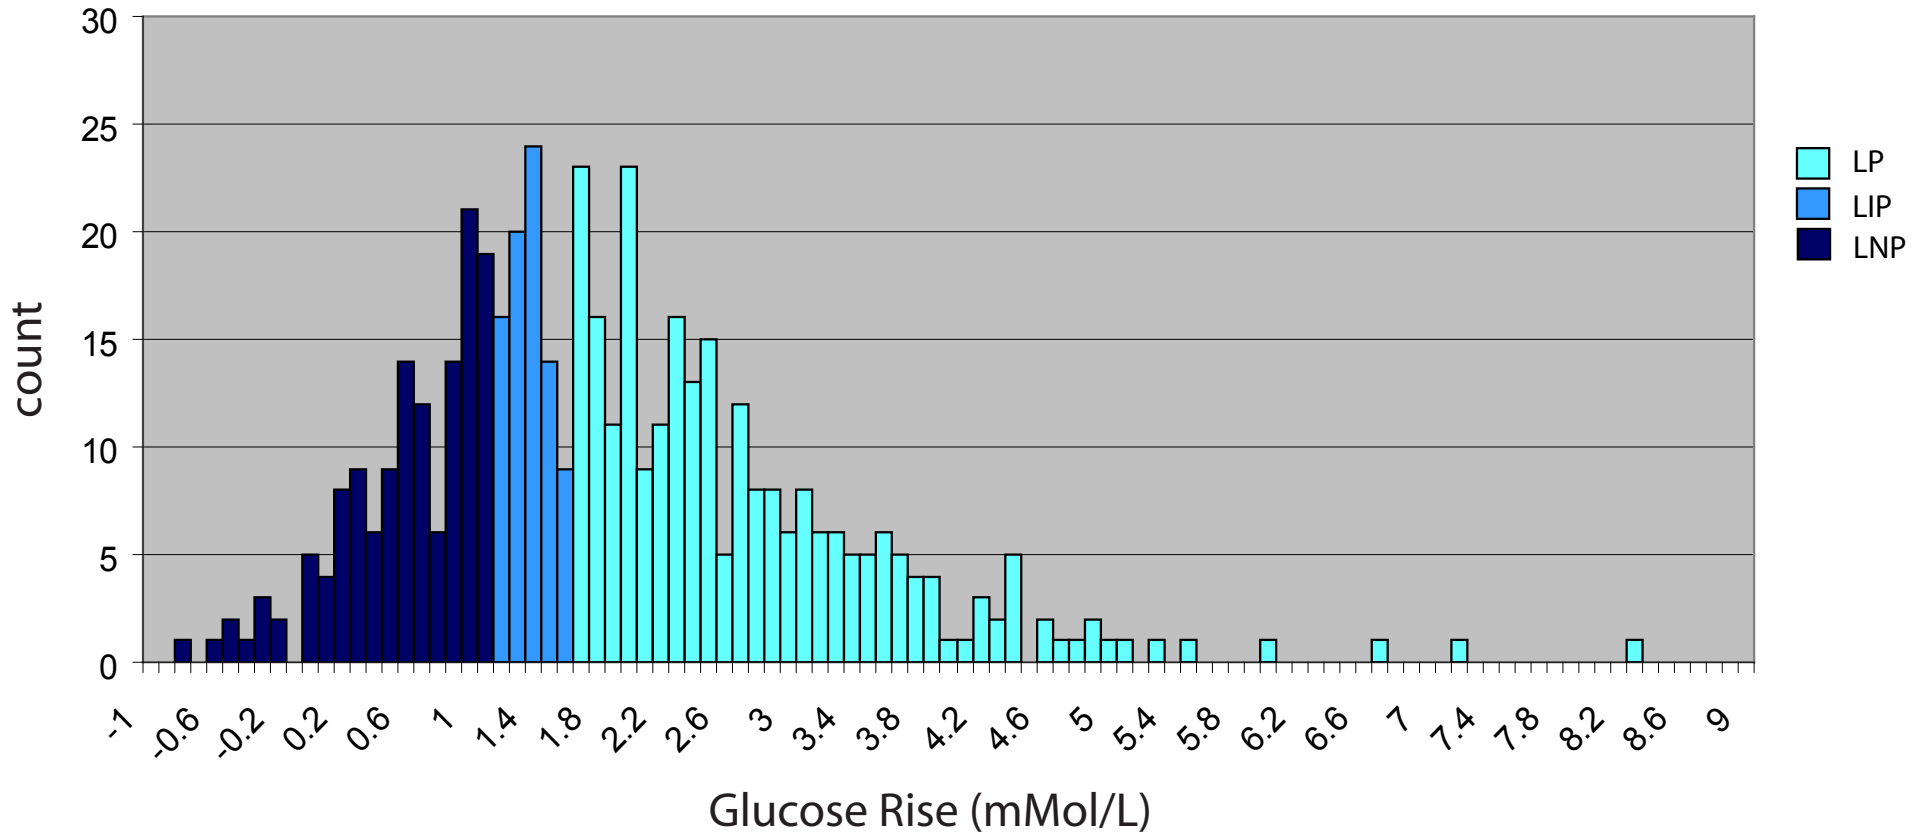

**Supplementary Figure 1.** *The distribution of phenotype values (mMol/L) for the pooled African dataset. Values of LP > 1.7 mMol/L glucose rise, 1.7 mMol/L > LIP > 1.1 mMol/L, LNP < 1.1 mMol/L are indicated by light blue, medium blue, and dark blue colors, respectively.*
