# Supplementary material
Source: PubMed Central journal article supplement (PMC2672153)
Supplement: NIHMS4417-supplement-Fig_2.pdf [file NIHMS4417-supplement-Fig_2.pdf]

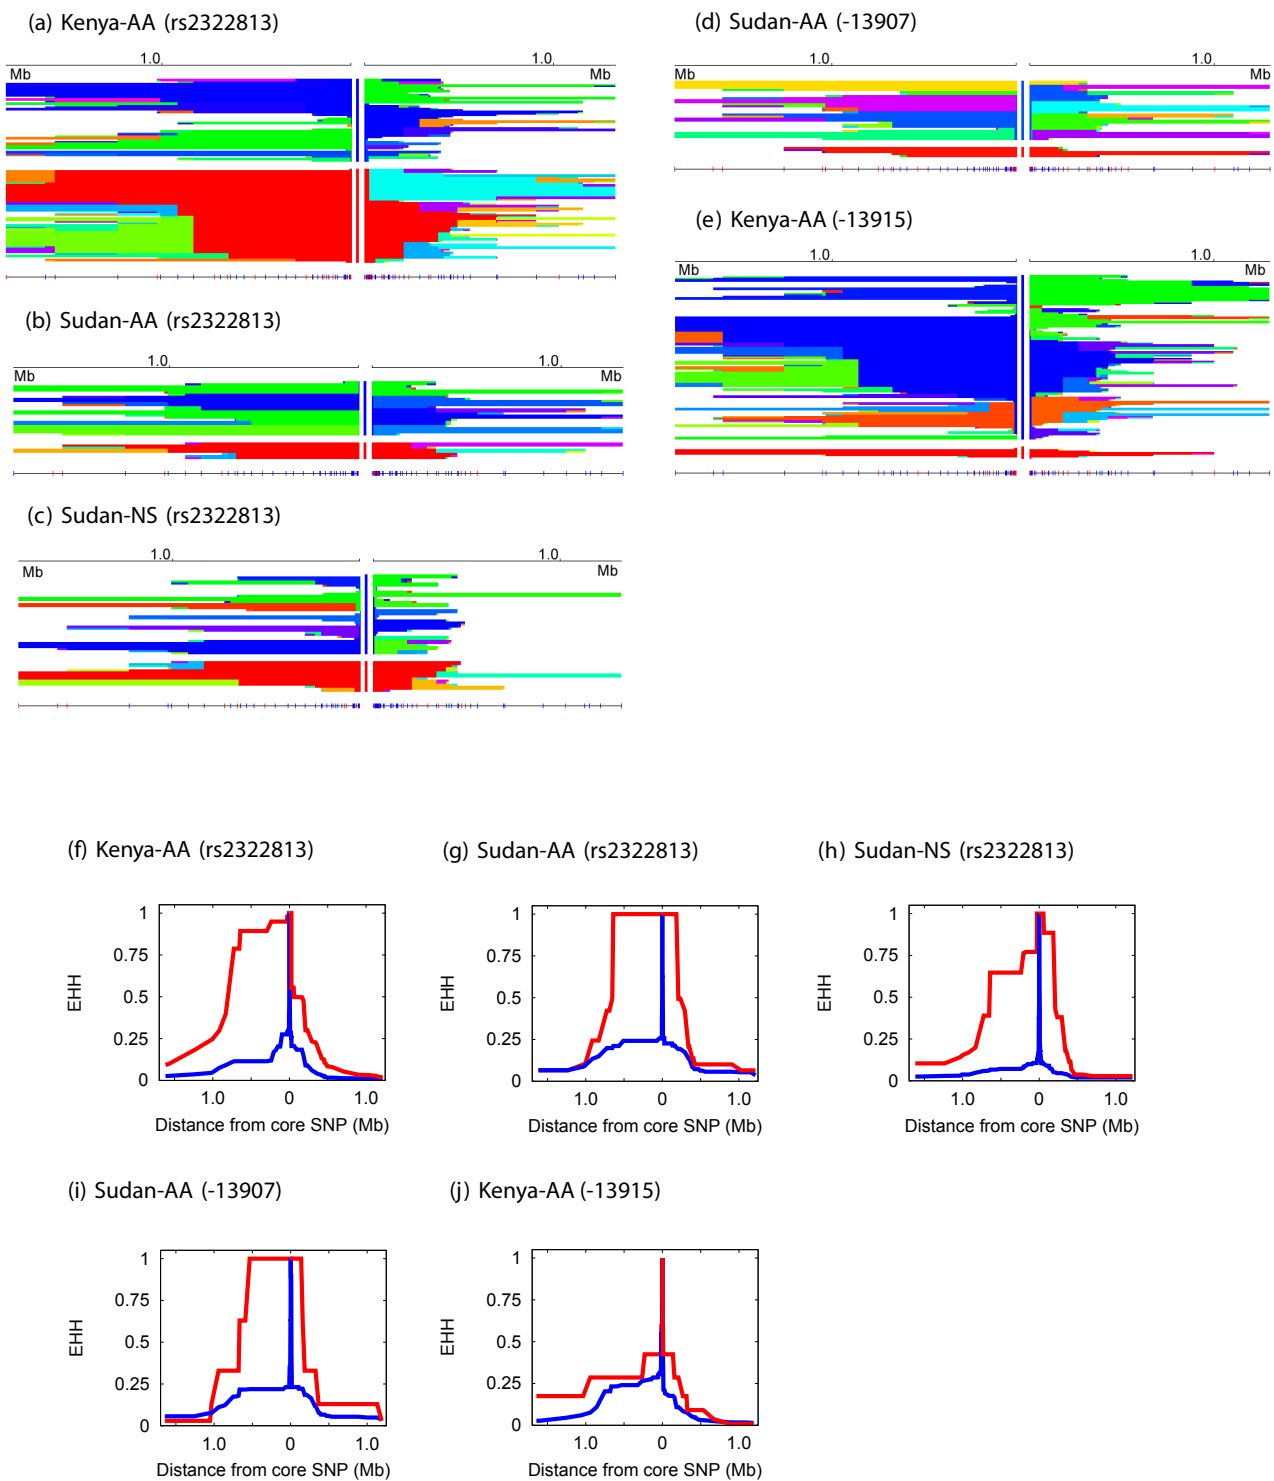

**Supplementary Figure 2.** *Plots of the extent and decay of haplotype homozygosity in the region surrounding the G - rs2322813, G -13907 and G -13915 alleles. (a – c) Decay of haplotypes for the G - rs2322813 allele in AA Kenyan, N.S. Sudanese, and A.A. Sudanese populations. Horizontal lines are haplotypes; SNP positions are marked below the haplotype plot. These plots are divided into two parts: the upper portion of the plot displays haplotypes with the ancestral alleles (colored blue) whereas the lower portion displays haplotypes with the derived alleles (colored red). For a given SNP, adjacent haplotypes with the same color carry identical genotypes everywhere between that SNP and the central (selected) site. The left- and right-hand sides are sorted separately. Haplotypes are no longer plotted beyond the points at which they become unique. (d) Decay of haplotypes for the G -13907 allele in the AA Sudanese Beja population. (e) Decay of haplotypes for the G -13915 allele in the AA Kenyan population (f – j). Decay of extended haplotype homozygosity for the G –rs2322813, G-13907, and G -13915 alleles (shown in red) relative to the ancestral alleles (shown in blue) over physical distance in the same populations as above.*
