# Supplementary material
Source: PubMed Central journal article supplement (PMC2672153)
Supplement: NIHMS4417-supplement-Fig_3.pdf [file NIHMS4417-supplement-Fig_3.pdf]

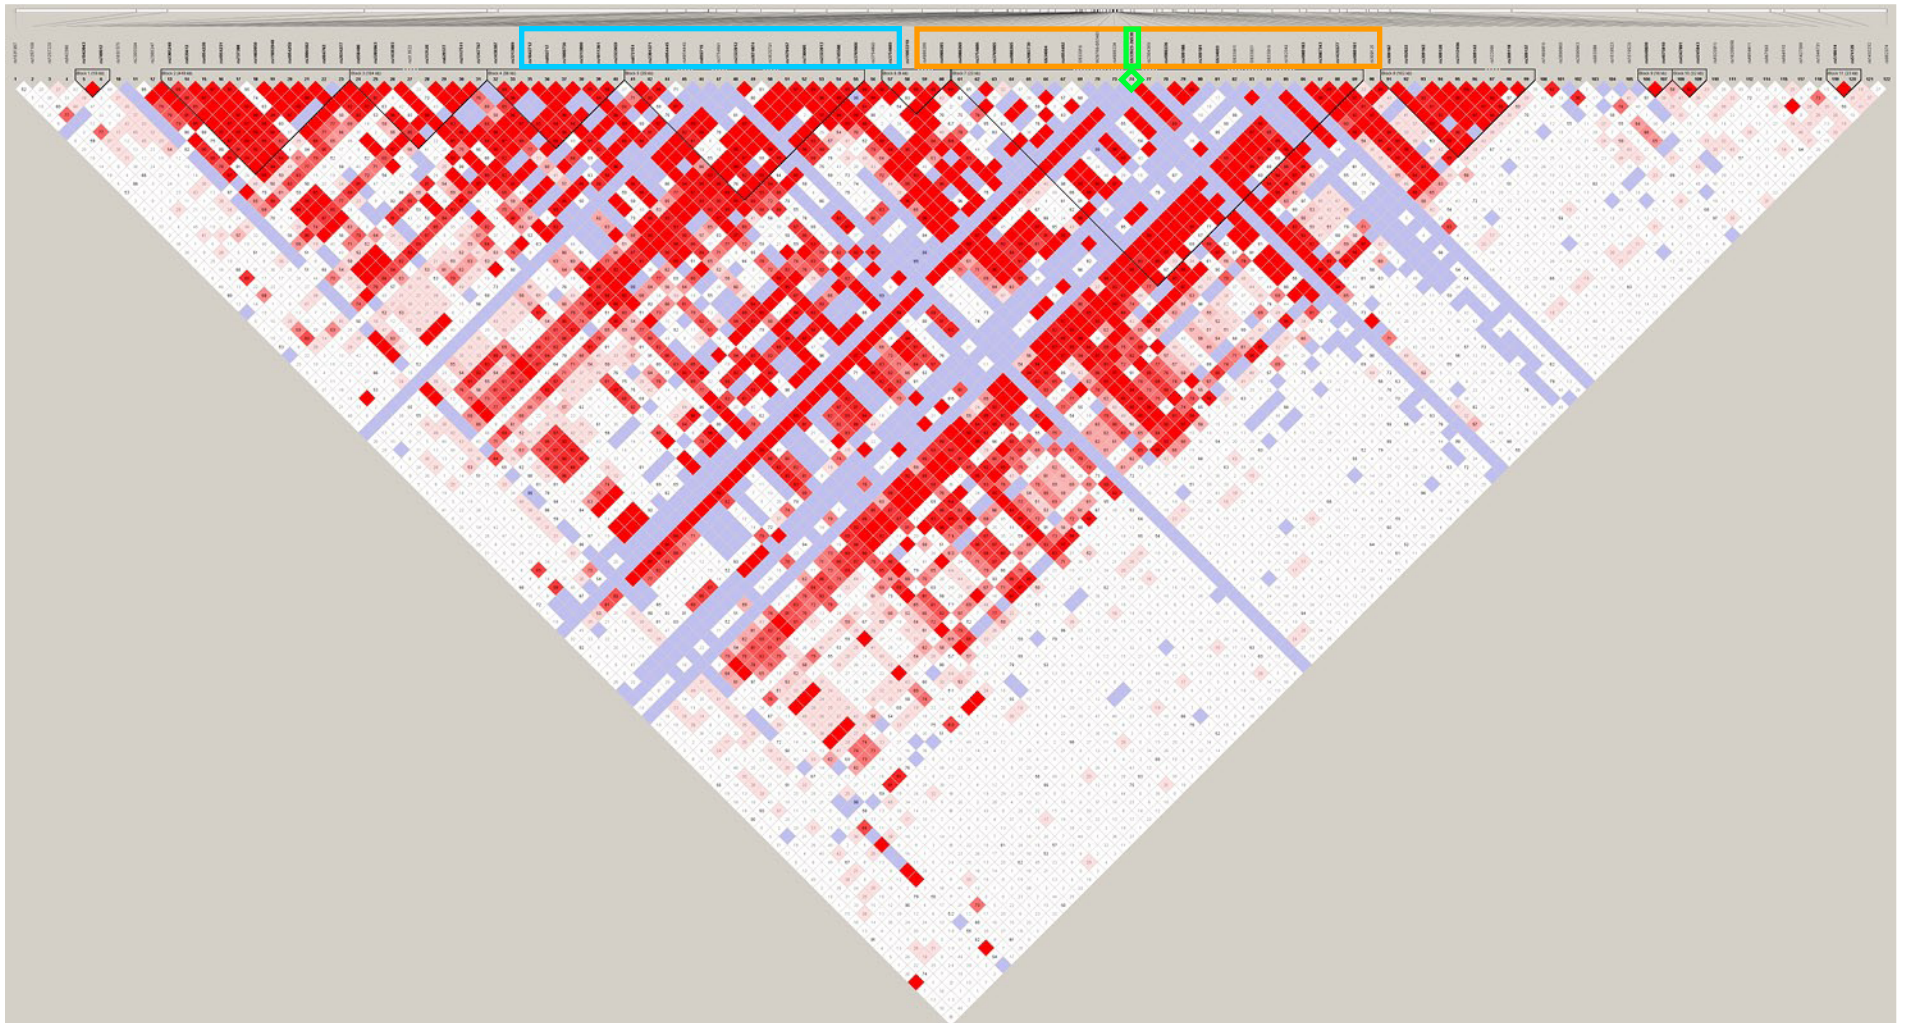

**Supplementary Figure 3.** A plot of the degree of LD between each pair of genotyped SNPs. Markers in the MCM6 gene region are boxed in orange. Markers in the LCT gene region are boxed in blue. G/C -14010 is indicated by a green box. A  $D'$  value  $< 1$  with  $\text{LOD} < 2$  is indicated by white. A  $D'$  value of 1 with  $\text{LOD} < 2$  is indicated by blue. A  $D'$  value  $< 1$  with  $\text{LOD} > 2$  is indicated by shades of pink/red, a  $D'$  value of 1 with  $\text{LOD} > 2$  is indicated by dark red. Analysis of pairwise LD across the 3 Mbp region encompassing the LCT and MCM6 genes, indicates high LD ( $D' > .9$ ,  $\text{LOD}$  scores  $> 2$ ), extending the farthest distance (1.04 Mbp) for SNP G/C -14010. LD decreases sharply at markers located  $> 1,035$  kbp 3' and  $> 184$  kbp 5' of the G/C -14010 SNP, suggesting hotspots of recombination in these regions.
