# Supplementary material
Source: PubMed Central journal article supplement (PMC2672153)
Supplement: NIHMS4417-supplement-Tabel3.pdf [file NIHMS4417-supplement-Tabel3.pdf]

**Supplemental Table 3: Significance of iHS under assorted demographic models**

| Demographic Model     | Kenya-AA | Kenya-NS | Tanzania-AA | Tanzania-NS | Tanzania-NK | Tanzania-SW |
|-----------------------|----------|----------|-------------|-------------|-------------|-------------|
| Growth (Model 1)      | 0.14     | <0.01    | <0.01       | <0.01       | <0.01       | 0.13        |
| Growth (Model 2)      | 0.14     | <0.01    | <0.01       | <0.01       | <0.01       | 0.12        |
| Growth (Model 3)      | 0.21     | <0.01    | <0.01       | <0.01       | <0.01       | 0.13        |
| Growth (Model 4)      | 0.17     | <0.01    | <0.01       | <0.01       | <0.01       | 0.24        |
| Growth (Model 5)      | 0.15     | <0.01    | <0.01       | <0.01       | <0.01       | 0.11        |
| Growth (Model 6)      | 0.15     | <0.01    | <0.01       | <0.01       | <0.01       | 0.09        |
|                       |          |          |             |             |             |             |
| Bottleneck (Model 1)  | 0.14     | <0.01    | <0.01       | <0.01       | <0.01       | <0.01       |
| Bottleneck (Model 2)  | 0.13     | <0.01    | <0.01       | <0.01       | <0.01       | <0.01       |
| Bottleneck (Model 3)  | 0.02     | <0.01    | <0.01       | <0.01       | <0.01       | <0.01       |
| Bottleneck (Model 4)  | 0.011    | <0.01    | <0.01       | <0.01       | <0.01       | <0.01       |
| Bottleneck (Model 5)  | <0.01    | <0.01    | <0.01       | <0.01       | <0.01       | <0.01       |
|                       |          |          |             |             |             |             |
| Bottleneck (Model 6)  | <0.01    | <0.01    | <0.01       | <0.01       | <0.01       | 0.13        |
| Bottleneck (Model 7)  | 0.011    | <0.01    | <0.01       | <0.01       | <0.01       | 0.11        |
| Bottleneck (Model 8)  | <0.01    | <0.01    | <0.01       | <0.01       | <0.01       | <0.01       |
| Bottleneck (Model 9)  | <0.01    | <0.01    | <0.01       | <0.01       | <0.01       | <0.01       |
|                       |          |          |             |             |             |             |
| Bottleneck (Model 10) | <0.01    | <0.01    | <0.01       | <0.01       | <0.01       | <0.01       |
| Bottleneck (Model 11) | <0.01    | <0.01    | <0.01       | <0.01       | <0.01       | <0.01       |

### **Growth Models**

Exponential growth beginning at  $t_{\text{onset}}$  generations in the past at rate  $\alpha$ :  $N_F = N_A * \exp(t_{\text{onset}} * \alpha)$ . Various models were taken from Voight et al. (2005).

1:  $\alpha = 0$ ,  $N_A = 11156$  [no growth]

2:  $\alpha = 0.00075$ ,  $t_{\text{onset}} = 1000$ ,  $N_A = 10659$  [~2x growth starting 25,000 years ago, approximate MLE for Hausa data based on Voight et al. (2005)]

3:  $\alpha = 0.01$ ,  $t_{\text{onset}} = 250$ ,  $N_A = 10860$  [~12x growth starting 6,250 years ago]

4:  $\alpha = 0.00025$ ,  $t_{\text{onset}} = 5000$ ,  $N_A = 8449$  [~4x growth starting 125,000 ya]

5:  $\alpha = 0.00075$ ,  $t_{\text{onset}} = 1000$ ,  $N_A = 12300$  [same as 2, with upper confidence bound for  $N_A$  based on Voight et al. (2005)]

6:  $\alpha = 0.00075$ ,  $t_{\text{onset}} = 1000$ ,  $N_A = 9450$  [same as 3, with lower confidence bound for  $N_A$  based on Voight et al. (2005)]

### **Bottleneck models**

A population of ancestral size  $N_A$  experiences an instantaneous reduction in population size to  $b * N_A$ , which persists for  $t_{\text{dur}}$  generations. The population recovers to 1x (Models 1-5), 10x (Models 6-10), or 50x (Models 11 & 12) of the ancestral population size after the bottleneck.

Bottleneck, with recovery after the bottleneck to initial population size [ $N_A = 10,659$ ]

1:  $b = 1.0$  [no bottleneck]

2:  $b = 0.1$ ,  $t_{dur} = 100$ ,  $T = 1600$  [90% reduction in population size occurring 37,500 years ago lasting 2,500 years]

3:  $b = 0.01$ ,  $t_{dur} = 100$ ,  $T = 1600$  [99% reduction in population size occurring 37,500 years ago lasting 2,500 years]

4:  $b = 0.01$ ,  $t_{dur} = 200$ ,  $T = 1600$  [99% reduction in population size occurring 35,000 years ago lasting 5,000 years]

5:  $b = 0.01$ ,  $t_{dur} = 400$ ,  $T = 1600$  [99% reduction in population size occurring 30,000 years ago lasting 10,000 years]

Bottleneck, with 10x increase in original population size after the bottleneck [ $N_A = 10,659$ ]

6:  $b = 0.01$ ,  $t_{dur} = 100$ ,  $T = 1600$  [99% reduction in population size occurring 37,500 years ago lasting 2,500 years]

7:  $b = 0.01$ ,  $t_{dur} = 200$ ,  $T = 1600$  [99% reduction in population size occurring 35,000 years ago lasting 5,000 years]

8:  $b = 0.01$ ,  $t_{dur} = 100$ ,  $T = 400$  [99% reduction in population size occurring 7,500 years ago lasting 2,500 years]

9:  $b = 0.01$ ,  $t_{dur} = 100$ ,  $T = 200$  [99% reduction in population size occurring 2,500 years ago lasting 2,500 years]

Bottleneck, with 50x increase in pop size after the bottleneck [ $N_A = 10,659$ ]

10:  $b = 0.01$ ,  $t_{dur} = 50$ ,  $T = 200$  [99% reduction in population size occurring 3,750 ya lasting 1,250 years]

11:  $b = 0.005$ ,  $t_{dur} = 50$ ,  $T = 200$  [99.5% reduction in population size occurring 3,750 ya lasting 1,250 years]
