# Supplementary material
Source: PubMed Central journal article supplement (PMC2672153)
Supplement: NIHMS4417-supplement-Table1.pdf [file NIHMS4417-supplement-Table1.pdf]

**Supplementary Table 1.** *Language, subsistence and lactase persistence classifications of sampled populations and LP-associated allele frequencies.*

| Region/Language Family/<br>Population | Subsistence                       | Phenotyped | Lactase<br>Persistent | Lactase<br>Intermediate<br>Persistent | Lactase<br>Non-<br>Persistent | Genotyped | -14010      | -13907     | -13910     | -13915     | -22018     |
|---------------------------------------|-----------------------------------|------------|-----------------------|---------------------------------------|-------------------------------|-----------|-------------|------------|------------|------------|------------|
|                                       |                                   |            |                       |                                       |                               |           | C%          | G%         | T%         | G%         | A%         |
| <b>Kenya</b>                          |                                   |            |                       |                                       |                               |           |             |            |            |            |            |
| <i>Afro-Asiatic</i>                   |                                   |            |                       |                                       |                               |           |             |            |            |            |            |
| Burji                                 | Agro-pastoralist                  | 8          | 3                     | 2                                     | 3                             | 8         | 6.3         | 0.0        | 0.0        | 0.0        | 0.0        |
| Borana                                | Pastoralist                       | 8          | 5                     | 1                                     | 2                             | 8         | 12.5        | 12.5       | 0.0        | 18.8       | 0.0        |
| El Molo                               | Fishing/Pastoralist               | 9          | 4                     | 3                                     | 2                             | 9         | 11.1        | 0.0        | 0.0        | 0.0        | 0.0        |
| Gabra                                 | Pastoralist                       | 9          | 8                     | 1                                     | 0                             | 9         | 0.0         | 11.1       | 0.0        | 27.8       | 0.0        |
| Konso                                 | Agro-pastoralist                  | 6          | 2                     | 2                                     | 2                             | 6         | 8.3         | 0.0        | 0.0        | 8.3        | 0.0        |
| Rendille                              | Pastoralist                       | 8          | 5                     | 1                                     | 2                             | 8         | 12.5        | 6.3        | 0.0        | 12.5       | 0.0        |
| Somali                                | Pastoralist                       | 1          | 1                     | 0                                     | 0                             | 1         | 0.0         | 0.0        | 0.0        | 50.0       | 0.0        |
| Wata                                  | Hunter-gatherer                   | 1          | 0                     | 0                                     | 1                             | 1         | 0.0         | 0.0        | 0.0        | 0.0        | 0.0        |
| Yaaku                                 | Hunter-gatherers/Pastoralist      | 14         | 8                     | 5                                     | 1                             | 14        | 53.6        | 4.2        | 0.0        | 0.0        | 0.0        |
| <b>Total</b>                          |                                   | <b>64</b>  | <b>36</b>             | <b>15</b>                             | <b>13</b>                     | <b>64</b> | <b>18.3</b> | <b>4.8</b> | <b>0.0</b> | <b>9.4</b> | <b>0.0</b> |
| <i>Nilo-Saharan</i>                   |                                   |            |                       |                                       |                               |           |             |            |            |            |            |
| Maasai                                | Pastoralist                       | 32         | 23                    | 6                                     | 3                             | 32        | 57.8        | 3.1        | 0.0        | 0.0        | 0.0        |
| Marakwet                              | Agro-pastoralist                  | 6          | 3                     | 1                                     | 2                             | 7         | 35.7        | 0.0        | 0.0        | 7.1        | 0.0        |
| Nandi                                 | Agro-pastoralist                  | 4          | 0                     | 2                                     | 2                             | 4         | 25.0        | 0.0        | 0.0        | 0.0        | 0.0        |
| Ogiek                                 | Agro-pastoralist/Hunter-gatherers | 11         | 6                     | 0                                     | 5                             | 11        | 36.4        | 0.0        | 0.0        | 0.0        | 0.0        |
| Pokot                                 | Pastoralist                       | 14         | 6                     | 4                                     | 4                             | 14        | 28.6        | 0.0        | 0.0        | 3.6        | 0.0        |
| Sabaot                                | Agro-pastoralist                  | 6          | 3                     | 2                                     | 1                             | 6         | 16.7        | 0.0        | 0.0        | 0.0        | 0.0        |
| Samburu                               | Pastoralist                       | 9          | 8                     | 0                                     | 1                             | 9         | 27.8        | 6.3        | 0.0        | 5.6        | 0.0        |
| Sengwer                               | Agro-pastoralist/Hunter-gatherers | 16         | 2                     | 4                                     | 10                            | 16        | 6.3         | 0.0        | 0.0        | 0.0        | 0.0        |
| Tugen                                 | Agro-pastoralist                  | 16         | 8                     | 5                                     | 3                             | 16        | 18.8        | 0.0        | 0.0        | 0.0        | 0.0        |

|                                       |                  |            |                       |                                       |                               |            | -14010      | -13907      | -13910     | -13915      | -22018     |
|---------------------------------------|------------------|------------|-----------------------|---------------------------------------|-------------------------------|------------|-------------|-------------|------------|-------------|------------|
| Region/Language Family/<br>Population | Subsistence      | Phenotyped | Lactase<br>Persistent | Lactase<br>Intermediate<br>Persistent | Lactase<br>Non-<br>Persistent | Genotyped  | C%          | G%          | T%         | G%          | A%         |
| Turkana                               | Pastoralist      | 12         | 4                     | 4                                     | 4                             | 13         | 20.8        | 0.0         | 0.0        | 0.0         | 0.0        |
| <b>Total</b>                          |                  | <b>126</b> | <b>63</b>             | <b>28</b>                             | <b>35</b>                     | <b>128</b> | <b>31.5</b> | <b>1.2</b>  | <b>0.0</b> | <b>1.2</b>  | <b>0.0</b> |
| <i>Niger-Kordofanian</i>              |                  |            |                       |                                       |                               |            |             |             |            |             |            |
| Kikuyu                                | Agriculturalist  | 2          | 1                     | 0                                     | 1                             | 2          | 75.0        | 0.0         | 0.0        | 0.0         | 0.0        |
| <b>Kenya Total</b>                    |                  | <b>192</b> | <b>100</b>            | <b>43</b>                             | <b>49</b>                     | <b>194</b> | <b>27.6</b> | <b>2.4</b>  | <b>0.0</b> | <b>3.9</b>  | <b>0.0</b> |
| <b>Sudan</b>                          |                  |            |                       |                                       |                               |            |             |             |            |             |            |
| <i>Afro-Asiatic</i>                   |                  |            |                       |                                       |                               |            |             |             |            |             |            |
| Beja Banuamir                         | Pastoralist      | 6          | 6                     | 0                                     | 0                             | 6          | 0.0         | 25.0        | 0.0        | 16.7        | 0.0        |
| Beja Hadandawa                        | Pastoralist      | 11         | 9                     | 0                                     | 2                             | 11         | 0.0         | 18.2        | 0.0        | 9.1         | 0.0        |
| <b>Total</b>                          |                  | <b>17</b>  | <b>15</b>             | <b>0</b>                              | <b>2</b>                      | <b>17</b>  | <b>0.0</b>  | <b>20.6</b> | <b>0.0</b> | <b>11.8</b> | <b>0.0</b> |
| <i>Nilo-Saharan</i>                   |                  |            |                       |                                       |                               |            |             |             |            |             |            |
| Dinka                                 | Pastoralist      | 9          | 6                     | 2                                     | 1                             | 9          | 0.0         | 0.0         | 0.0        | 0.0         | 0.0        |
| Koalib                                | Agro-pastoralist | 1          | 1                     | 0                                     | 0                             | 1          | 0.0         | 0.0         | 0.0        | 0.0         | 0.0        |
| Liguri/Logorik                        | Agro-pastoralist | 1          | 0                     | 0                                     | 1                             | 1          | 0.0         | 0.0         | 0.0        | 0.0         | 0.0        |
| Masalit                               | Agro-pastoralist | 1          | 1                     | 0                                     | 0                             | 1          | 0.0         | 0.0         | 0.0        | 0.0         | 0.0        |
| Nuer                                  | Pastoralist      | 4          | 2                     | 2                                     | 0                             | 5          | 0.0         | 0.0         | 0.0        | 0.0         | 0.0        |
| Ama                                   | Agro-pastoralist | 2          | 1                     | 0                                     | 1                             | 2          | 0.0         | 0.0         | 0.0        | 0.0         | 0.0        |
| Shilook                               | Pastoralist      | 8          | 3                     | 4                                     | 1                             | 8          | 0.0         | 0.0         | 0.0        | 0.0         | 0.0        |
| <b>Total</b>                          |                  | <b>26</b>  | <b>14</b>             | <b>8</b>                              | <b>4</b>                      | <b>27</b>  | <b>0.0</b>  | <b>0.0</b>  | <b>0.0</b> | <b>0.0</b>  | <b>0.0</b> |
| <b>Sudan Total</b>                    |                  | <b>43</b>  | <b>29</b>             | <b>8</b>                              | <b>6</b>                      | <b>44</b>  | <b>0.0</b>  | <b>8.0</b>  | <b>0.0</b> | <b>4.5</b>  | <b>0.0</b> |
| <b>Tanzania</b>                       |                  |            |                       |                                       |                               |            |             |             |            |             |            |
| <i>Afro-Asiatic</i>                   |                  |            |                       |                                       |                               |            |             |             |            |             |            |
| Burunge                               | Agro-pastoralist | 18         | 6                     | 2                                     | 10                            | 18         | 38.2        | 0.0         | 0.0        | 0.0         | 0.0        |
| Iraqw                                 | Agro-pastoralist | 21         | 18                    | 2                                     | 1                             | 39         | 57.7        | 0.0         | 0.0        | 0.0         | 0.0        |
| Mbugu                                 | Agro-pastoralist | 30         | 10                    | 7                                     | 13                            | 30         | 31.0        | 0.0         | 0.0        | 0.0         | 0.0        |
| Fiome                                 | Agro-pastoralist | 12         | 1                     | 5                                     | 6                             | 12         | 55.0        | 0.0         | 0.0        | 0.0         | 0.0        |
| <b>Total</b>                          |                  | <b>81</b>  | <b>35</b>             | <b>16</b>                             | <b>30</b>                     | <b>99</b>  | <b>45.8</b> | <b>0.0</b>  | <b>0.0</b> | <b>0.0</b>  | <b>0.0</b> |

| Region/Language Family/<br>Population | Subsistence                      | Phenotyped | Lactase<br>Persistent | Lactase<br>Intermediate<br>Persistent | Lactase<br>Non-<br>Persistent | Genotyped  | -14010      | -13907     | -13910     | -13915     | -22018     |
|---------------------------------------|----------------------------------|------------|-----------------------|---------------------------------------|-------------------------------|------------|-------------|------------|------------|------------|------------|
|                                       |                                  |            |                       |                                       |                               |            | C%          | G%         | T%         | G%         | A%         |
| <i>Nilo-Saharan</i>                   |                                  |            |                       |                                       |                               |            |             |            |            |            |            |
| Akie                                  | Hunter-gatherers/<br>Pastoralist | 14         | 6                     | 3                                     | 5                             | 14         | 25.0        | 0.0        | 0.0        | 0.0        | 3.6        |
| Datog                                 | Pastoralist                      | 4          | 0                     | 3                                     | 1                             | 4          | 62.5        | 0.0        | 0.0        | 0.0        | 0.0        |
| Dorobo                                | Hunter-gatherers/<br>Pastoralist | 10         | 4                     | 4                                     | 2                             | 10         | 40.0        | 0.0        | 0.0        | 0.0        | 0.0        |
| Maasai                                | Pastoralist                      | 17         | 10                    | 2                                     | 5                             | 19         | 44.7        | 0.0        | 0.0        | 0.0        | 0.0        |
| <b>Total</b>                          |                                  | <b>45</b>  | <b>20</b>             | <b>12</b>                             | <b>13</b>                     | <b>47</b>  | <b>39.4</b> | <b>0.0</b> | <b>0.0</b> | <b>0.0</b> | <b>1.1</b> |
| <i>Niger-Kordofanian</i>              |                                  |            |                       |                                       |                               |            |             |            |            |            |            |
| Mbugwe                                | Agro-pastoralist                 | 13         | 4                     | 5                                     | 4                             | 13         | 26.9        | 0.0        | 0.0        | 3.8        | 0.0        |
| Pare                                  | Agro-pastoralist                 | 10         | 6                     | 2                                     | 2                             | 10         | 10.0        | 0.0        | 0.0        | 0.0        | 0.0        |
| Rangi                                 | Agro-pastoralist                 | 35         | 17                    | 9                                     | 9                             | 35         | 27.1        | 0.0        | 0.0        | 0.0        | 0.0        |
| Samba'a                               | Agro-pastoralist                 | 3          | 0                     | 1                                     | 2                             | 3          | 0.0         | 0.0        | 0.0        | 0.0        | 0.0        |
| <b>Total</b>                          |                                  | <b>61</b>  | <b>27</b>             | <b>17</b>                             | <b>17</b>                     | <b>61</b>  | <b>23.0</b> | <b>0.0</b> | <b>0.0</b> | <b>0.8</b> | <b>0.0</b> |
| <i>Khoisan</i>                        |                                  |            |                       |                                       |                               |            |             |            |            |            |            |
| Hadza                                 | Hunter-gatherer                  | 18         | 9                     | 3                                     | 6                             | 18         | 0.0         | 0.0        | 0.0        | 0.0        | 0.0        |
| Sandawe                               | Hunter-gatherer*                 | 30         | 8                     | 7                                     | 15                            | 31         | 13.3        | 0.0        | 0.0        | 0.0        | 0.0        |
| <b>Total</b>                          |                                  | <b>48</b>  | <b>17</b>             | <b>10</b>                             | <b>21</b>                     | <b>49</b>  | <b>8.3</b>  | <b>0.0</b> | <b>0.0</b> | <b>0.0</b> | <b>0.0</b> |
| <b>Tanzania Total</b>                 |                                  | <b>235</b> | <b>99</b>             | <b>55</b>                             | <b>81</b>                     | <b>256</b> | <b>31.9</b> | <b>0.0</b> | <b>0.0</b> | <b>0.2</b> | <b>0.2</b> |
| <b>East Africa Total</b>              |                                  | <b>470</b> | <b>228</b>            | <b>106</b>                            | <b>136</b>                    | <b>494</b> | <b>27.4</b> | <b>1.6</b> | <b>0.0</b> | <b>2.0</b> | <b>0.1</b> |
| <i>Bersaglieri et al.</i>             |                                  |            |                       |                                       |                               |            |             |            |            |            |            |
| European                              |                                  | -          | -                     | -                                     | -                             | 92         | -           | -          | 81.5       | -          | 81.7       |
| African American                      |                                  | -          | -                     | -                                     | -                             | 50         | -           | -          | 14.0       | -          | 13.3       |
| Asian                                 |                                  | -          | -                     | -                                     | -                             | 35         | -           | -          | 0.0        | -          | 0.0        |

\* Adopted agriculture and pastoralism within the past few hundred years
