# Supplementary material
Source: PubMed Central journal article supplement (PMC2672153)
Supplement: NIHMS4417-supplement-Table2.pdf [file NIHMS4417-supplement-Table2.pdf]

**Supplementary Table 2.** *Genotyped SNP identifications and locations.*

| <b>SNP ID</b> | <b>Band</b> | <b>May 2004<br/>Assembly</b> | <b>MCM6<br/>Position</b> | <b>LCT<br/>Position</b> |
|---------------|-------------|------------------------------|--------------------------|-------------------------|
| rs1531957     | 2q21.2      | 134593039                    | 1875977                  | 1835429                 |
| rs1257168     | 2q21.2      | 134797624                    | 1671392                  | 1630844                 |
| rs1257220     | 2q21.2      | 134849079                    | 1619937                  | 1579389                 |
| rs842360      | 2q21.3      | 135181617                    | 1287399                  | 1246851                 |
| rs1942043     | 2q21.3      | 135389224                    | 1079792                  | 1039244                 |
| rs749017      | 2q21.3      | 135407391                    | 1061625                  | 1021077                 |
| rs766271      | 2q21.3      | 135500863                    | 968153                   | 927605                  |
| rs2322254     | 2q21.3      | 135584581                    | 884435                   | 843887                  |
| rs1551497     | 2q21.3      | 135621374                    | 847642                   | 807094                  |
| rs1031575     | 2q21.3      | 135691662                    | 777354                   | 736806                  |
| rs2305594     | 2q21.3      | 135724340                    | 744676                   | 704128                  |
| rs2305247     | 2q21.3      | 135762024                    | 706992                   | 666444                  |
| rs2305248     | 2q21.3      | 135762044                    | 706972                   | 666424                  |
| rs935612      | 2q21.3      | 135775235                    | 693781                   | 653233                  |
| rs4954228     | 2q21.3      | 135810230                    | 658786                   | 618238                  |
| rs4954231     | 2q21.3      | 135850246                    | 618770                   | 578222                  |
| rs737388      | 2q21.3      | 135906943                    | 562073                   | 521525                  |
| rs1469950     | 2q21.3      | 135961986                    | 507030                   | 466482                  |
| rs11892948    | 2q21.3      | 136031488                    | 437528                   | 396980                  |
| rs4954259     | 2q21.3      | 136071726                    | 397290                   | 356742                  |
| rs3806502     | 2q21.3      | 136122005                    | 347011                   | 306463                  |
| rs984763      | 2q21.3      | 136178770                    | 290246                   | 249698                  |
| rs2034277     | 2q21.3      | 136210726                    | 258290                   | 217742                  |
| rs958400      | 2q21.3      | 136214578                    | 254438                   | 213890                  |
| rs2289963     | 2q21.3      | 136239610                    | 229406                   | 188858                  |
| rs1438303     | 2q21.3      | 136263589                    | 205427                   | 164879                  |
| rs313522      | 2q21.3      | 136264598                    | 204418                   | 163870                  |
| rs313520      | 2q21.3      | 136273603                    | 195413                   | 154865                  |
| rs629377      | 2q21.3      | 136285456                    | 183560                   | 143012                  |
| rs2117511     | 2q21.3      | 136296393                    | 172623                   | 132075                  |
| rs1347767     | 2q21.3      | 136319389                    | 149627                   | 109079                  |
| rs1438307     | 2q21.3      | 136332898                    | 136118                   | 95570                   |
| rs3213889     | 2q21.3      | 136345307                    | 123709                   | 83161                   |
| rs2304602     | 2q21.3      | 136371673                    | 97343                    | 56795                   |
| rs1042712     | 2q21.3      | 136379576                    | 89440                    | 48892                   |
| rs892717      | 2q21.3      | 136381848                    | 87168                    | 46620                   |

|            |        |           |       |        |
|------------|--------|-----------|-------|--------|
| rs1808756  | 2q21.3 | 136381924 | 87092 | 46544  |
| rs3213890  | 2q21.3 | 136385920 | 83096 | 42548  |
| rs1011361  | 2q21.3 | 136387371 | 81645 | 41097  |
| rs2322659  | 2q21.3 | 136389391 | 79625 | 39077  |
| rs872151   | 2q21.3 | 136390537 | 78479 | 37931  |
| rs2304371  | 2q21.3 | 136395289 | 73727 | 33179  |
| rs17699796 | 2q21.3 | 136396186 | 72830 | 32282  |
| rs4954445  | 2q21.3 | 136405714 | 63302 | 22754  |
| rs4954449  | 2q21.3 | 136409266 | 59750 | 19202  |
| rs892715   | 2q21.3 | 136410309 | 58707 | 18159  |
| rs3754691  | 2q21.3 | 136411449 | 57567 | 17019  |
| rs2322812  | 2q21.3 | 136411772 | 57244 | 16696  |
| rs2874874  | 2q21.3 | 136411926 | 57090 | 16542  |
| rs3820791  | 2q21.3 | 136415417 | 53599 | 13051  |
| rs1470457  | 2q21.3 | 136415580 | 53436 | 12888  |
| rs730005   | 2q21.3 | 136416426 | 52590 | 12042  |
| rs2322813  | 2q21.3 | 136416541 | 52475 | 11927  |
| rs745500   | 2q21.3 | 136416924 | 52092 | 11544  |
| rs3769008  | 2q21.3 | 136419915 | 49101 | 8553   |
| rs3754690  | 2q21.3 | 136424290 | 44726 | 4178   |
| rs3754689  | 2q21.3 | 136424478 | 44538 | 3990   |
| rs11903319 | 2q21.3 | 136430171 | 38845 | -1703  |
| rs4988286  | 2q21.3 | 136431258 | 37758 | -2790  |
| rs4988285  | 2q21.3 | 136431298 | 37718 | -2830  |
| rs4988269  | 2q21.3 | 136436023 | 32993 | -7555  |
| rs3754686  | 2q21.3 | 136437008 | 32008 | -8540  |
| rs3769005  | 2q21.3 | 136437098 | 31918 | -8630  |
| rs4988265  | 2q21.3 | 136437370 | 31646 | -8902  |
| rs2082730  | 2q21.3 | 136440473 | 28543 | -12005 |
| GS34004    | 2q21.3 | 136441963 | 27053 | -13495 |
| rs4954492  | 2q21.3 | 136442198 | 26818 | -13730 |
| GS34001    | 2q21.3 | 136442221 | 26795 | -13753 |
| GS33916    | 2q21.3 | 136442268 | 26748 | -13800 |
| -13907     | 2q21.3 | 136442375 | 26641 | -13907 |
| rs4988236  | 2q21.3 | 136442376 | 26640 | -13908 |
| rs4988235  | 2q21.3 | 136442378 | 26638 | -13910 |
| -13915     | 2q21.3 | 136442383 | 26633 | -13915 |
| rs4988234  | 2q21.3 | 136442405 | 26611 | -13937 |
| -14010     | 2q21.3 | 136442478 | 26538 | -14010 |

|               |        |           |         |         |
|---------------|--------|-----------|---------|---------|
| GS33923-26537 | 2q21.3 | 136442479 | 26537   | -14011  |
| rs4988233     | 2q21.3 | 136442479 | 26537   | -14011  |
| rs2304369     | 2q21.3 | 136443052 | 25964   | -14584  |
| rs4988226     | 2q21.3 | 136444330 | 24686   | -15862  |
| rs309180      | 2q21.3 | 136447987 | 21029   | -19519  |
| rs309181      | 2q21.3 | 136448545 | 20471   | -20077  |
| rs309181      | 2q21.3 | 136448545 | 20471   | -20077  |
| GS34003       | 2q21.3 | 136449773 | 19243   | -21305  |
| GS33915       | 2q21.3 | 136449890 | 19126   | -21422  |
| GS33921       | 2q21.3 | 136449956 | 19060   | -21488  |
| GS33919       | 2q21.3 | 136450110 | 18906   | -21642  |
| rs182549      | 2q21.3 | 136450486 | 18530   | -22018  |
| rs4988183     | 2q21.3 | 136455778 | 13238   | -27310  |
| rs3087343     | 2q21.3 | 136456275 | 12741   | -27807  |
| rs1435577     | 2q21.3 | 136458679 | 10337   | -30211  |
| rs4988161     | 2q21.3 | 136462403 | 6613    | -33935  |
| rs309125      | 2q21.3 | 136477287 | -8271   | -48819  |
| rs309167      | 2q21.3 | 136502996 | -33980  | -74528  |
| rs192822      | 2q21.3 | 136516006 | -46990  | -87538  |
| rs309163      | 2q21.3 | 136525089 | -56073  | -96621  |
| rs309120      | 2q21.3 | 136542519 | -73503  | -114051 |
| rs3112496     | 2q21.3 | 136544796 | -75780  | -116328 |
| rs309142      | 2q21.3 | 136549056 | -80040  | -120588 |
| rs522086      | 2q21.3 | 136568873 | -99857  | -140405 |
| rs309118      | 2q21.3 | 136579956 | -110940 | -151488 |
| rs309137      | 2q21.3 | 136599683 | -130667 | -171215 |
| rs1469816     | 2q21.3 | 136626148 | -157132 | -197680 |
| rs2090660     | 2q21.3 | 136652451 | -183435 | -223983 |
| rs2090663     | 2q21.3 | 136664267 | -195251 | -235799 |
| rs953388      | 2q21.3 | 136740861 | -271845 | -312393 |
| rs1519523     | 2q21.3 | 136768181 | -299165 | -339713 |
| rs1519529     | 2q21.3 | 136807989 | -338973 | -379521 |
| rs4440020     | 2q21.3 | 136824059 | -355043 | -395591 |
| rs4075810     | 2q21.3 | 136836877 | -367861 | -408409 |
| rs4347891     | 2q21.3 | 136869410 | -400394 | -440942 |
| rs4245843     | 2q21.3 | 136873516 | -404500 | -445048 |
| rs4325815     | 2q21.3 | 136889113 | -420097 | -460645 |
| rs10205050    | 2q21.3 | 136898465 | -429449 | -469997 |
| rs4954411     | 2q21.3 | 136910157 | -441141 | -481689 |

|           |        |           |          |          |
|-----------|--------|-----------|----------|----------|
| rs4501004 | 2q21.3 | 136940479 | -471463  | -512011  |
| rs867563  | 2q21.3 | 136976232 | -507216  | -547764  |
| rs694510  | 2q21.3 | 137114593 | -645577  | -686125  |
| rs876338  | 2q21.3 | 137122879 | -653863  | -694411  |
| rs1427588 | 2q21.3 | 137326058 | -857042  | -897590  |
| rs1346731 | 2q22.1 | 137446319 | -977303  | -1017851 |
| rs518614  | 2q22.1 | 137550583 | -1081567 | -1122115 |
| rs574135  | 2q22.1 | 137573852 | -1104836 | -1145384 |
| rs1432232 | 2q22.1 | 137633396 | -1164380 | -1204928 |
| rs882374  | 2q22.1 | 137747027 | -1278011 | -1318559 |

LEGEND

|                                                                                   |                                    |
|-----------------------------------------------------------------------------------|------------------------------------|
|  | LCT gene region                    |
|  | MCM6 gene region                   |
|  | Associated with LP in Europe       |
|  | New SNPs discovered in East Africa |
|  | Associated with LP in East Africa  |
